# Supplementary material for: Untargeted Molecular Analysis of Exhaled Breath as a Diagnostic Test for Ventilator-Associated Lower Respiratory Tract Infections (BreathDx)
Source: HighWire-hosted journal article supplement (doi:10.1136/thoraxjnl-2021-217362), 2021-06-04
Supplement: thoraxjnl-2021-217362supp001_data_supplement.pdf [file thoraxjnl-2021-217362supp001_data_supplement.pdf]

1 Online supplementary material

2

3 **Molecular Analysis of Exhaled Breath as a Diagnostic Test for Ventilator–Associated Lower**  
4 **Respiratory Tract Infections (BreathDx) – an international multicentre observational study**

5 Poulina M. P. van Oort<sup>1</sup>, Tamara Nijssen<sup>2</sup>, Iain White<sup>3</sup>, Hugo Knobel<sup>4</sup>, Timothy Felton<sup>5,6</sup>, Nicholas J. W.  
6 Rattray<sup>7</sup>, Oluwasola Lawal<sup>6</sup>, Murtaza Bulut<sup>2</sup>, Waqar M. Ahmed<sup>3</sup>, Antonio Artigas<sup>8</sup>, Pedro Póvoa<sup>9</sup>,  
7 Ignacio Martin-Loeches<sup>10</sup>, Hans Weda<sup>11</sup>, Royston Goodacre<sup>3,12</sup>, Marcus J. Schultz<sup>1,13</sup>, Paul Dark<sup>5,6</sup>,  
8 Stephen J. Fowler<sup>5,6†</sup> and Lieuwe D. J. Bos<sup>1†\*</sup> on behalf of the BreathDx Consortium<sup>†</sup>

9

10 \*Correspondence: [l.d.bos@amsterdamumc.nl](mailto:l.d.bos@amsterdamumc.nl), tel. +31613901359

11 <sup>1</sup>Department of Intensive Care, Amsterdam UMC – location Academic Medical Centre (AMC),  
12 Meibergdreef 9, 1105 AZ, Amsterdam, the Netherlands.

13 <sup>2</sup>Philips Research, High Tech Campus 34, 5656 AE, Eindhoven, the Netherlands.

14 <sup>3</sup>Manchester Institute of Biotechnology (MIB), the University of Manchester, 131 Princess Street,  
15 Manchester, M1 7DN, UK.

16 <sup>4</sup>Eurofins Materials Science Netherlands BV, High Tech Campus 11, 5656 AE, Eindhoven, the  
17 Netherlands

18 <sup>5</sup>Manchester University NHS Foundation Trust – Wythenshawe Hospital, Southmoor Rd,  
19 Wythenshawe, Manchester, M23 9LT, UK.

20 <sup>6</sup>Division of Infection, Immunity and Respiratory Medicine, NIHR’s Manchester Biomedical Research  
21 Centre (BRC), the University of Manchester, 29 Grafton St, Manchester, M13 9WU, UK.

22 <sup>7</sup>Department of Pharmacy, University of Strathclyde, 16 Richmond St, Glasgow, G1 1XQ, UK.

23 <sup>8</sup>Critical Care Department, CIBER Enfermedades Respiratorias, Corporacion Sanitaria Universitaria  
24 Parc Tauli, Parc Tauli 1, 08208 Sabadell, Barcelona, Spain.

25 <sup>9</sup>Hospital de São Francisco Xavier, Centro Hospitalar Lisboa Ocidental, NOVA Medical School, New  
26 University of Lisbon, Estr. Forte do Alto Duque, 1449-005, Lisbon, Portugal.

27 <sup>10</sup>Department of Clinical Medicine, St James's Hospital, Multidisciplinary Intensive Care Research  
28 Organization (MICRO), Trinity Centre for Health Sciences, Dublin 8, James' St, Ireland.

29 <sup>11</sup>Orikami, Ridderstraat 29, 6511 TM, Nijmegen, the Netherlands

30 <sup>12</sup>Department of Biochemistry, University of Liverpool, Institute of Integrative Biology, Liverpool, L69  
31 3BX, UK.

32 <sup>13</sup>Mahidol–Oxford Tropical Medicine Research Unit (MORU), Mahidol University, 420/6 Rajvithi Road,  
33 Tungphyathai, Bangkok 10400, Thailand

34

35 †Authors contributed equally.

36

37 Available ORCID ID's:

38 L.D. Bos (corresponding author): [0000-0003-2911-4549](https://orcid.org/0000-0003-2911-4549)

39 P.M.P. van Oort: [0000-0002-2719-8817](https://orcid.org/0000-0002-2719-8817)

40 H. Knobel: [0000-0002-3548-4928](https://orcid.org/0000-0002-3548-4928)

41 N. Rattray: [0000-0002-3528-6905](https://orcid.org/0000-0002-3528-6905)

42 O. Lawal: [0000-0002-7134-4930](https://orcid.org/0000-0002-7134-4930)

43 W. Ahmed: [0000-0003-1490-6391](https://orcid.org/0000-0003-1490-6391)

44 A. Artigas: [0000-0002-8029-1017](https://orcid.org/0000-0002-8029-1017)

45 P. Pova: [0000-0002-7069-7304](https://orcid.org/0000-0002-7069-7304)

46 I. Martin-Loeches: [0000-0002-5834-4063](https://orcid.org/0000-0002-5834-4063)

47 H. Weda: [0000-0001-6675-2270](https://orcid.org/0000-0001-6675-2270)

48 R. Goodacre: 0000-0003-2230-645X

49 P. Dark: [0000-0003-3309-0164](https://orcid.org/0000-0003-3309-0164)

50 S. Fowler: [0000-0002-4524-1663](https://orcid.org/0000-0002-4524-1663)

51

52

53 **Online methods**

54 **Design and ethical considerations**

55 The ‘Molecular Analysis of Exhaled Breath as Diagnostic Test for Ventilator–Associated Pneumonia’ –  
56 study (BreathDx) was an international multicentre observational cohort study in ICU patients  
57 undergoing invasive ventilation and commencing antimicrobial therapy for suspected VA-LRTI.  
58 Patients were recruited across four ICUs of university hospitals in the Netherlands and the United  
59 Kingdom: Amsterdam UMC – location AMC in Amsterdam, the Netherlands; Manchester University  
60 NHS Foundation Trust – Wythenshawe Hospital (WH), Manchester University NHS Foundation Trust –  
61 Manchester Royal Infirmary (MRI) and Salford Royal NHS Foundation Trust (SRFT) in Manchester,  
62 United Kingdom. Patients were recruited over a 24-month period, between February 2016 and  
63 February 2018. The study was approved by the institutional review boards of the individual  
64 institutions and, in the case of the UK, by a National Health Service Research Ethics Committee. Since  
65 this study concerned patients lacking capacity, formal assent was sought with a designated consultee  
66 at time of inclusion. Deferred consent was obtained for patients who regained capacity. BreathDx  
67 was registered at UK Clinical Research Network (ID number 19086). The study methods have been  
68 published [1].

69

70 **Patients**

71 Inclusion criteria were: (1) age 18 years or older; (2) intubation and mechanical ventilation for 48  
72 hours or more; and (3) clinical suspicion of VA-LRTI by the treating physician followed by the  
73 initiation of broad-spectrum antibiotics. Patients who were deemed inappropriate to collect samples  
74 from (e.g. patients receiving end-of-life care) were excluded. Patients in strict isolation (e.g. in case of  
75 Middle East Respiratory Syndrome, Ebola or resistant tuberculosis) were also excluded.

76

**77 Standard care**

78 In all hospitals heat and moisture exchangers (HMEs) were used and there was focussed training on  
79 hand hygiene control measures.

80 As part of standard care for prevention of nosocomial infections, patients at the ICU of the AMC in  
81 Amsterdam received selective decontamination of the digestive tract (SDD). The antibiotic protocol  
82 for suspected VA-LRTI was intravenous treatment with amoxicillin/clavulanic acid and ceftazidime at  
83 this site. No SDD was used on the ICUs of the three Manchester based hospitals. For Wythenshawe  
84 hospital the antibiotic treatment for VA-LRTI consisted of amoxicillin/clavulanic acid when VA-LRTI  
85 developed before day 5 of mechanical ventilation while piperacillin-tazobactam was started after day  
86 5. On the ICU of Salford Royal, amoxicillin/clavulanic acid was used as first line treatment for VA-LRTI  
87 in case of less than 7 days of hospitalization; at day 7 or beyond piperacillin-tazobactam was  
88 administered. On Manchester Royal Infirmary's ICU the first choice was piperacillin-tazobactam (or  
89 meropenem in case of known colonisation with an Extended Spectrum Beta-Lactamase (ESBL)),  
90 aimed for de-escalation to amoxicillin/clavulanic acid as soon as cultures and sensitivities were  
91 confirmed.

92

**93 Sample size calculation and study endpoints**

94 The sample size calculation has been described before [1]. The intended use of our breath test is to  
95 refute a diagnosis of a respiratory infection and to withhold antibiotics in patients clinically suspected  
96 of VA-LRTI. The primary reference test was culture positive / negative VA-LRTI. For this purpose, a  
97 test with a very high sensitivity is required to minimise false-negative results. Predefining a sensitivity  
98 of 98-100% and with a lower 95% confidence-boundary of 90% sensitivity, resulted in 61 estimated  
99 required cases with culture positivity [2]. We assumed a prevalence of 40% of positive cultures of  
100 BAL in suspected VA-LRTI patients based on literature [3]. It was estimated that a total study sample

101 size was 153 subjects was required to meet these criteria. Taken together with high sensitivity this  
102 would result in 95-100% NPV, theoretically sufficient to withhold antibiotics.

103

#### 104 **Definitions of ventilator-associated lower respiratory tract infections**

105 Suspected VAP was defined by: (1) clinical suspicion for VA-LRTI by the physician based on signs of  
106 infection [temperature  $>38$  or  $<36.5^{\circ}\text{C}$ ; white blood cell count  $<4,000$  or  $>12,000/\text{mm}^3$ , purulent  
107 tracheal secretions], and (2) new infiltrates on chest X-ray. Suspected VAT did not require the second  
108 criterion. Positive (mini)-BAL cultures with a colony forming unit (CFU) cut-off of  $>10^4$  CFU/mL  
109 confirmed VA-LRTI and this was used as the reference test.

110

#### 111 **Study procedures**

112 Patients were recruited and samples were collected within 24 hours of the clinical suspicion of VAP.  
113 Exhaled breath samples were collected at first, followed by lower respiratory tract fluid samples (BAL  
114 or mini-BAL samples). Breath samples were sent for analysis within two days of collection and  
115 analysed within two weeks of arrival. The (mini)-BAL samples were processed and frozen  
116 immediately at  $-80^{\circ}\text{C}$  after recruitment. Clinical information, reference standard results and index  
117 test results were available to the researchers without blinding.

118

#### 119 **Bronchoalveolar lavage**

120 A broncho-alveolar lavage (BAL) sample was obtained for microbiological analysis directly after  
121 collection of the breath samples by bronchoscopy or through a non-directed approach.  
122 Bronchoscopic BAL was performed according to the BTS guidelines [4]. For non-directed BAL, a  
123 syringe was connected to a 50cm suctioning catheter, followed by an injection of 20mL 0.9% saline

124 into the airway. At least 4mL was aspirated of which 1mL was used for culturing. A semi-quantitative  
125 bacterial count with a cut-off of  $10^4$  CFU/mL defined a positive culture.

126

### 127 **Breath sampling and analysis**

128 The specifications and origins of the equipment used for breath sampling have been described  
129 previously [1], and met the criteria formulated in the ERS technical statement on exhaled breath  
130 analysis [5]. Breath samples were collected at one time point using a breath gas sampler (BGS)  
131 containing a pump and a mass flow controller. This BGS was used together with PTFE  
132 (Polytetrafluoroethylene) tubing. 1200mL of exhaled breath was collected onto stainless steel  
133 sorbent tubes using the method described in the protocol [1]. All samples were collected in duplicate  
134 and link-anonymised. Subsequently, the samples were sent to two different laboratory locations for  
135 analysis (one pair to Philips Research, Eindhoven, the Netherlands, and the other to the Manchester  
136 Institute of Biotechnology, University of Manchester, UK). The samples that were collected for  
137 analysis at Philips Research, the exhaled breath was collected using sorbent tubes packed with  
138 300mg Carbograph 5TD (Markes International, Llantrisant, UK) and 90mg Tenax GR (Sigma-Aldrich  
139 Chemie B.V., Zwijndrecht, the Netherlands). The samples that were destined to be analysed at the  
140 Manchester Institute of Biotechnology were collected using 200mg Tenax GR (Markes International,  
141 Llantrisant, UK) sorbent tubes. The duplicate sample was used to assess repeatability of the  
142 measurement. Importantly, the machines were designed to capture a different fraction of exhaled  
143 metabolites and were not set-up to replicate, but rather to provide a comprehensive overview of the  
144 VOCs in the breath of patients with suspected VA-LRTI.

145

### 146 **Statistical analysis**

147 The sample size was not met in the chosen time frame for recruitment, due to an unexpected low  
148 presentation of VA-LRTI suspected cases at all study sites. Despite this, we maintained all predefined  
149 cut-offs for clinically relevant test characteristics. Data were visually inspected for exclusion of  
150 contaminated samples, failed chromatography runs, and technical errors prior to any link to the  
151 clinical characteristics of the patient. Unreliable or failed breath measurements were not included in  
152 the subsequent analysis (figure 1). The method for peak detection and alignment has been explained  
153 in the BreathDx protocol paper [1]. The resulting peak table was used for data exploration and  
154 untargeted analysis. Data exploration was performed using principal component analysis (PCA) on  
155  $\log_{10}$ -transformed and scaled data. Major potential influential factors such as the replacement of GC  
156 columns and other instrument parts, recruitment centres, duration of sample storage, and duration  
157 of mechanical ventilation were assessed by data visualisation.

158 Each row in the subsequent ion-fragment peak table corresponded with a sample. Columns  
159 contained sample and patient metadata (e.g. sample data and clinical characteristics), and the  
160 abundances of the peaks or ion-fragments at a particular retention time: a few thousand depending  
161 on the analytical platform. This table served as input for the following statistical analysis. Volatile  
162 organic compounds (VOCs; referred to in the text as volatile metabolites) were identified using the  
163 National Institute of Standards and Technology library on both GC-MS platforms [6] and the certainty  
164 of identification was reported with Metabolomics Standard Initiative (MSI) levels [7].

165 Untargeted analysis was used to investigate the primary outcome of the study. First, VOCs were  
166 studied individually using multiple linear models by generalized least squares with the *limma* R-  
167 package, resulting in adjusted  $p$ -values and fold changes. These were visualised in Volcano plots. For  
168 multi-dimensional data analysis, sparse partial least squares (SPLS) models were fitted on the log-  
169 transformed data, as described previously [8]. VOCs were chosen if the algorithm selected the VOC in  
170 more than 40% of permutated scenarios indicating stability of selection. The data could not be split  
171 into a training set and a validation set due to the relatively small number of patients. Instead,

172 permutation tests were used to evaluate the performance of the model and the correct classification  
173 rate (CCR) based on random label permutation was reported.

174 The moderation of effect by the presence of: 1) new infiltrates (VAP *versus* VAT); 2) the early *versus*  
175 late development of VA-LRTI was assessed by including these factors as an interaction term in a  
176 logistic regression model. The influence of potential confounders (e.g. comorbidities, ventilator  
177 settings, medications) on the association between exhaled breath and VA-LRTI was investigated. For  
178 this the log odds ratios were compared between a logistic regression model with the VOCs of interest  
179 as dependent variables and VA-LRTI (yes/no) as independent variable, and the same model with the  
180 inclusion of the potential confounder as co-variate. The co-variate was considered a confounder  
181 when a change of  $\geq 10\%$  was observed for the log odds ratio. The odds ratios with confidence  
182 intervals are presented for the association between the breath test and proven VAP and for models  
183 that include all potential confounders as co-variate.

184

185



## 186 Online Tables

187 Table S1. Patient characteristics per study site

|                                                 |                                   | AMC (N= 57) |             | MRI (N= 17) |               | Salford (N= 31) |             | WH (N= 3) |             |
|-------------------------------------------------|-----------------------------------|-------------|-------------|-------------|---------------|-----------------|-------------|-----------|-------------|
| <b>Age (years)</b>                              | <i>Median (IQR)</i>               | 60          | (49.8-68)   | 71          | (64-78)       | 48.5            | (29.2-58.8) | 51        | (48.5-57.5) |
| <b>Male</b>                                     | <i>N (%)</i>                      | 42          | (73.7)      | 9           | (52.9)        | 20              | (64.5)      | 1         | (33.3)      |
| <b>Days on ICU*</b>                             | <i>Median (IQR)</i>               | 9           | (6-13)      | 7           | (3.5-13)      | 6               | (4-9)       | 12        | (7.5-13)    |
| <b>Admission type</b>                           | <i>Medical – N (%)</i>            | 33          | (57.9)      | 9           | (52.9)        | 5               | (16.1)      | 3         | (100.0)     |
|                                                 | <i>Emergency surgical – N (%)</i> | 14          | (24.6)      | 2           | (11.8)        | 15              | (48.4)      | 0         | 0           |
|                                                 | <i>Planned surgical – N (%)</i>   | 10          | (17.5)      | 5           | (29.4)        | 11              | (35.5)      | 0         | 0           |
|                                                 | <i>Unscored – N (%)</i>           | 0           | 0           | 1           | (5.9)         | 0               | 0           | 0         | 0           |
| <b>Trauma</b>                                   | <i>N (%)</i>                      | 10          | (17.5)      | 2           | (11.8)        | 20              | (64.5)      | 1         | (33.3)      |
| <b>Neurosurgery</b>                             | <i>N (%)</i>                      | 7           | (12.3)      | 2           | (11.8)        | 18              | (58.1)      | 0         | 0           |
| <b>COPD</b>                                     | <i>N (%)</i>                      | 10          | (17.5)      | 3           | (17.6)        | 0               | 0           | 1         | (33.3)      |
| <b>ARDS</b>                                     | <i>N (%)</i>                      | 4           | (7.0)       | 0           | 0             | 0               | 0           | 0         | 0           |
| <b>CPIS</b>                                     | <i>Median (IQR)</i>               | 5           | (4-6)       | 6           | (4-6)         | 7               | (6-7)       | 5         | (3.5-6)     |
| <b>APACHE II</b>                                | <i>Median (IQR)</i>               | 20          | (15-24)     | 17          | (14-25)       | 11              | (8.5-17.5)  | 15        | (9-18.5)    |
| <b>Temperature (°C)</b>                         | <i>Median (IQR)</i>               | 38          | (37-39)     | 37          | (36-38)       | 38              | (38-39)     | 37        | (36.5-37)   |
| <b>WCC (10<sup>9</sup>/L)</b>                   | <i>Median (IQR)</i>               | 15.5        | (12-21.2)   | 13          | (8.8-17.2)    | 12              | (10.2-14.8) | 19        | (13-21.5)   |
| <b>PaO<sub>2</sub>/FiO<sub>2</sub> (mmHg/%)</b> | <i>Median (IQR)</i>               | 195         | (157.5-267) | 232.5       | (183.8-288.8) | 240             | (198.8-315) | 262.5     | (210-281.2) |
| <b>P<sub>max</sub> (cmH<sub>2</sub>O)</b>       | <i>Median (IQR)</i>               | 20          | (15-27.5)   | 20          | (17.8-22)     | 21              | (17-24)     | 20        | (15-24)     |
| <b>PEEP (cmH<sub>2</sub>O)</b>                  | <i>Median (IQR)</i>               | 7           | (5-10)      | 10          | (8-10)        | 7               | (5-8)       | 5         | (5-8.5)     |
| <b>Tidal volume (mL)</b>                        | <i>Median (IQR)</i>               | 452         | (370-536)   | 475.5       | (455.2-572)   | 565             | (483-614)   | 450       | (408-588)   |
| <b>No VA-LRTI</b>                               | <i>N (%)</i>                      | 38          | (66.7)      | 8           | (47.1)        | 8               | (25.8)      | 2         | (66.7)      |
| <b>VA-LRTI</b>                                  | <i>N (%)</i>                      | 19          | (33.3)      | 9           | (52.9)        | 23              | (74.2)      | 1         | (33.3)      |
| <b>Culture results**</b>                        | <i>N (%)</i>                      |             |             |             |               |                 |             |           |             |

|                                    |                     |        |         |        |             |        |         |        |             |
|------------------------------------|---------------------|--------|---------|--------|-------------|--------|---------|--------|-------------|
| <i>Acinetobacter pittii</i>        | 0                   | 0      | 0       | 0      | 1           | (3.2)  | 0       | 0      |             |
| <i>Enterobacter cloacae</i>        | 2                   | (3.5)  | 0       | 0      | 0           | 0      | 0       | 0      |             |
| <i>Escherichia coli</i>            | 0                   | 0      | 0       | 0      | 2           | (6.5)  | 1       | (33.3) |             |
| <i>Haemophilus influenzae</i>      | 0                   | 0      | 0       | 0      | 5           | (16.1) | 0       | 0      |             |
| <i>Klebsiella spp.</i>             | 1                   | (1.8)  | 3       | (17.7) | 2           | (6.5)  | 0       | 0      |             |
| <i>Pseudomonas aeruginosa</i>      | 6                   | (10.5) | 1       | (5.9)  | 2           | (6.5)  | 0       | 0      |             |
| <i>Serratia marcescens</i>         | 1                   | (1.8)  | 1       | (5.9)  | 0           | 0      | 0       | 0      |             |
| <i>Staphylococcus aureus</i>       | 4                   | (7.0)  | 2       | (11.8) | 9           | (29.0) | 0       | 0      |             |
| <i>Stenothrophomas maltophilia</i> | 2                   | (3.5)  | 0       | 0      | 0           | 0      | 0       | 0      |             |
| <b>ICU LOS (days)</b>              | <i>Median (IQR)</i> | 22     | (14-32) | 21.5   | (11-37.2)   | 21     | (15-28) | 33     | (19.5-34)   |
| <b>Hospital LOS (days)</b>         | <i>Median (IQR)</i> | 29     | (15-44) | 33     | (21.2-64.5) | 22     | (18-45) | 45.5   | (44.8-46.2) |
| <b>ICU mortality</b>               | <i>N (%)</i>        | 20     | (35.1)  | 2      | (11.8)      | 3      | (9.7)   | 1      | (33.3)      |

188

189 Table S1. Patient characteristics per study site. Continuous variables are expressed as median (25<sup>th</sup>–75<sup>th</sup> percentile); categorical variables as number of  
 190 patients (percentage). \*days on ICU until VA-LRTI suspicion. \*\* Potentially >1 cultured pathogen per patient. IQR = interquartile range; AMC = Academic  
 191 Medical Centre, Amsterdam; MRI = Manchester Royal Infirmary; WH = Wythenshawe hospital; ICU = intensive care unit; COPD = chronic obstructive  
 192 pulmonary disease; ARDS = acute respiratory distress syndrome; CPIS = clinical pulmonary infection score; APACHE = Acute Physiology and Chronic Health  
 193 Evaluation; WCC = white cell count; PaO<sub>2</sub>/FiO<sub>2</sub> = partial pressure of oxygen / inspired fraction of oxygen ratio; P<sub>max</sub> = maximum airway pressure; PEEP =  
 194 positive end-expiratory pressure; LOS = length-of-stay.

195

196

197

Table S2: Patient demographics for patients with GC-MS-1 sample available

|                                              |                            | Control (N=49) |               | VA-LRTI (N=44) |               |
|----------------------------------------------|----------------------------|----------------|---------------|----------------|---------------|
| <b>Age, years</b>                            | Median (IQR)               | 59             | (46-67)       | 59             | (42.5-69)     |
| <b>Male</b>                                  | N (%)                      | 37             | (75.5)        | 27             | (61.4)        |
| <b>Days on ICU*</b>                          | Median (IQR)               | 9              | (5.8-13.5)    | 6              | (4-9)         |
| <b>Admission type</b>                        | Medical – N (%)            | 30             | (61.2)        | 15             | (34.1)        |
|                                              | Emergency surgical – N (%) | 12             | (24.5)        | 15             | (34.1)        |
|                                              | Planned surgical – N (%)   | 6              | (12.2)        | 14             | (31.8)        |
|                                              | Unscored – N (%)           | 1              | (2)           | 0              | 0             |
| <b>Trauma</b>                                | N (%)                      | 6              | (12.2)        | 14             | (31.8)        |
| <b>Neurosurgery</b>                          | N (%)                      | 9              | (18.4)        | 15             | (34.1)        |
| <b>COPD</b>                                  | N (%)                      | 5              | (10.2)        | 8              | (18.2)        |
| <b>ARDS</b>                                  | N (%)                      | 4              | (8.2)         | 0              | (0)           |
| <b>CPIS</b>                                  | Median (IQR)               | 5              | (4-6)         | 7              | (5.8-7)       |
| <b>APACHE II</b>                             | Median (IQR)               | 20             | (15-22)       | 16             | (10-21.2)     |
| <b>Temperature, °C</b>                       | Median (IQR)               | 38             | (37-39)       | 38             | (37-38)       |
| <b>WCC, 10<sup>9</sup>/L</b>                 | Median (IQR)               | 15             | (10.5-21.5)   | 13             | (11.5-17.5)   |
| <b>PaO<sub>2</sub>/FiO<sub>2</sub>, mmHg</b> | Median (IQR)               | 231            | (157.5-268.5) | 240            | (172.5-283.5) |
| <b>P<sub>max</sub>, cmH<sub>2</sub>O</b>     | Median (IQR)               | 20             | (15.8-25.5)   | 20             | (16-24)       |
| <b>PEEP, cmH<sub>2</sub>O</b>                | Median (IQR)               | 8              | (5-10)        | 7.5            | (5-10)        |
| <b>Tidal volume, mL</b>                      | Median (IQR)               | 8              | (5-10)        | 7.5            | (5-10)        |
| <b>Confirmed VA-LRTI</b>                     | VAP – N (%)                |                |               | 36             | (81.8)        |
|                                              | VAT – N (%)                |                |               | 8              | (18.2)        |
| <b>Culture results**</b>                     | N (%)                      |                |               |                |               |
| <b>Acinetobacter pittii</b>                  |                            |                |               | 1              | (2.3)         |
| <b>Enterobacter cloacae</b>                  |                            |                |               | 1              | (2.3)         |
| <b>Escherichia coli</b>                      |                            |                |               | 2              | (4.5)         |
| <b>Haemophilus influenzae</b>                |                            |                |               | 5              | (11.4)        |
| <b>Klebsiella spp.</b>                       |                            |                |               | 6              | (13.6)        |
| <b>Pseudomonas aeruginosa</b>                |                            |                |               | 9              | (20.5)        |
| <b>Serratia marcescens</b>                   |                            |                |               | 1              | (2.3)         |
| <b>Staphylococcus aureus****</b>             |                            |                |               | 12             | (27.3)        |
| <b>Stenothrophomas maltophilia</b>           |                            |                |               | 2              | (4.5)         |
| <b>Other</b>                                 |                            |                |               | 5              | (11.4)        |
| <b>ICU LOS, days</b>                         | Median (IQR)               | 20             | (14-32.2)     | 21             | (15.2-27.8)   |
| <b>Hospital LOS, days</b>                    | Median (IQR)               | 27             | (14.5-41.5)   | 28             | (17-44)       |
| <b>ICU mortality</b>                         | N (%)                      | 16             | (32.7)        | 8              | (18.2)        |

Table S2. Patient demographics for patients with sample available on GC-MS-1. Continuous variables are expressed as median (25<sup>th</sup>–75<sup>th</sup> percentile); categorical variables as number of patients (percentage). \*days on ICU until VA-LRTI suspicion. \*\*Potentially >1 cultured pathogen per patient. \*\*\*\*All methicillin sensitive. IQR = interquartile range; ICU = intensive care unit; COPD = chronic obstructive pulmonary disease; ARDS = acute respiratory distress syndrome; CPIS = clinical pulmonary infection score; APACHE = Acute Physiology and Chronic Health Evaluation; WCC = white cell count; PaO<sub>2</sub>/FiO<sub>2</sub> = partial pressure of oxygen / inspired fraction of oxygen ratio; P<sub>max</sub> = maximum

airway pressure; PEEP = positive end-expiratory pressure; VA-LRTI = Ventilator associated lower respiratory tract infection; VAP = Ventilator associated pneumonia; VAT = Ventilator associated tracheobronchitis; LOS = length-of-stay.

Table S4: Patient demographics for patients with GC-MS-2 sample available

|                                              |                            | Control (N=44) |             | VA-LRTI (N=45) |             |
|----------------------------------------------|----------------------------|----------------|-------------|----------------|-------------|
| <b>Age, years</b>                            | Median (IQR)               | 59             | (47.5-66)   | 58,5           | (39.8-68.2) |
| <b>Male</b>                                  | N (%)                      | 30             | (68.2)      | 27             | (60)        |
| <b>Days on ICU*</b>                          | Median (IQR)               | 8              | (4-13.5)    | 6              | (4-9.5)     |
| <b>Admission type</b>                        | Medical – N (%)            | 27             | (61.4)      | 15             | (33.3)      |
|                                              | Emergency surgical – N (%) | 10             | (22.7)      | 14             | (31.1)      |
|                                              | Planned surgical – N (%)   | 6              | (13.6)      | 16             | (35.6)      |
|                                              | Unscored – N (%)           | 1              | (2)         | 0              | 0           |
| <b>Trauma</b>                                | N (%)                      | 9              | (20.5)      | 18             | (40)        |
| <b>Neurosurgery</b>                          | N (%)                      | 9              | (20.5)      | 18             | (40)        |
| <b>COPD</b>                                  | N (%)                      | 5              | (11.4)      | 6              | (13.3)      |
| <b>ARDS</b>                                  | N (%)                      | 1              | (2.3)       | 0              | 0           |
| <b>CPIS</b>                                  | Median (IQR)               | 5              | (4-6)       | 7              | (6-7)       |
| <b>APACHE II</b>                             | Median (IQR)               | 20             | (14.8-23.2) | 17             | (10-22)     |
| <b>Temperature, °C</b>                       | Median (IQR)               | 38             | (37-39)     | 38             | (37-38)     |
| <b>WCC, 10<sup>9</sup>/L</b>                 | Median (IQR)               | 14             | (9.2-17)    | 13             | (12-18)     |
| <b>PaO<sub>2</sub>/FiO<sub>2</sub>, mmHg</b> | Median (IQR)               | 236            | (161-285)   | 246            | (178-285)   |
| <b>P<sub>max</sub>, cmH<sub>2</sub>O</b>     | Median (IQR)               | 20             | (16-25)     | 21             | (16-25)     |
| <b>PEEP, cmH<sub>2</sub>O</b>                | Median (IQR)               | 8              | (5-10)      | 7              | (5-10)      |
| <b>Tidal volume, mL</b>                      | Median (IQR)               | 479            | (417-566)   | 468            | (390-588)   |
| <b>Confirmed VA-LRTI</b>                     | VAP – N (%)                |                |             | 34             | (75.6)      |
|                                              | VAT – N (%)                |                |             | 11             | (24.4)      |
| <b>Culture results**</b>                     | N (%)                      |                |             |                |             |
| <b>Acinetobacter pittii</b>                  |                            |                |             | 1              | (2.2)       |
| <b>Enterobacter cloacae</b>                  |                            |                |             | 2              | (4.4)       |
| <b>Escherichia coli</b>                      |                            |                |             | 2              | (4.4)       |
| <b>Haemophilus influenzae</b>                |                            |                |             | 5              | (11.1)      |
| <b>Klebsiella spp.</b>                       |                            |                |             | 5              | (11.1)      |
| <b>Pseudomonas aeruginosa</b>                |                            |                |             | 8              | (17.8)      |
| <b>Serratia marcescens</b>                   |                            |                |             | 2              | (4.4)       |
| <b>Staphylococcus aureus****</b>             |                            |                |             | 13             | (28.9)      |
| <b>Stenothrophomas maltophilia</b>           |                            |                |             | 1              | (2.2)       |
| <b>Other</b>                                 |                            |                |             | 7              | (15.6)      |
| <b>ICU LOS, days</b>                         | Median (IQR)               | 21             | (13.5-33)   | 21             | (15-30.5)   |
| <b>Hospital LOS, days</b>                    | Median (IQR)               | 31             | (14.8-45.5) | 30             | (19.5-50)   |
| <b>ICU mortality</b>                         | N (%)                      | 11             | (25)        | 7              | (15.6)      |

Table S3. Patient demographics for patients with sample available on GC-MS-2. Continuous variables are expressed as median (25<sup>th</sup>–75<sup>th</sup> percentile); categorical variables as number of patients (percentage). \*days on ICU until VA-LRTI suspicion. \*\*Potentially >1 cultured pathogen per patient. \*\*\*\*All methicillin sensitive. IQR = interquartile range; ICU = intensive care unit; COPD = chronic obstructive pulmonary disease; ARDS = acute respiratory distress syndrome; CPIS = clinical pulmonary infection score; APACHE = Acute Physiology and Chronic Health Evaluation; WCC = white cell count; PaO<sub>2</sub>/FiO<sub>2</sub> = partial pressure of oxygen / inspired fraction of oxygen ratio; P<sub>max</sub> = maximum

airway pressure; PEEP = positive end-expiratory pressure; VA-LRTI = Ventilator associated lower respiratory tract infection; VAP = Ventilator associated pneumonia; VAT = Ventilator associated tracheobronchitis; LOS = length-of-stay.

Table S4: VOCs included in the diagnostic model for GC-MS-2 for culture positivity.

| VOC ID                   | Suspected origin | MSI level | Abundance | Loadings |       |
|--------------------------|------------------|-----------|-----------|----------|-------|
| isopropylbenzene         | Endogenous       | 2         | ↓         | -0.29    | -0.34 |
| 2-propenylbenzene        | Unknown          | 2         | ↓         | -0.34    | -0.27 |
| 1-propenylbenzene        | Unknown          | 2         | ↓         | -0.34    | -0.23 |
| 2,6-difluorobenzaldehyde | Exogenous        | 2         | ↑         | 0.26     | -0.48 |
| 2-bromophenol            | Exogenous        | 2         | ↓         | -0.26    | 0.45  |
| m-di-tert-butylbenzene   | Unknown          | 2         | ↓         | -0.32    | -0.21 |
| cyclohexane              | Endogenous       | 2         | ↓         | -0.33    | -0.06 |
| 2,6,7-trimethyldecane    | Unknown          | 2         | ↑         | 0.34     | -0.04 |
| 2-methyldecane           | Endogenous       | 2         | ↑         | 0.31     | -0.10 |
| 3-methylheptane          | Endogenous       | 2         | ↓         | -0.33    | -0.01 |
| cyclohexanol             | Endogenous       | 2         | ↑         | 0.13     | -0.51 |

Table S4. VOCs included in the diagnostic model for GC-MS-2 for prediction of positive cultures. Abundance of the compound was either increased (↑) or decreased (↓) in the breath of patients with positive cultures. Loadings show the loading factors to the two projected components in the sPLS-DA model.;VOC = volatile organic compound; IC = identity; MSI = Metabolomics Standards Initiative. \*Also significant in univariate modelling shown in Volcano plot. Endogenous indicates that a molecule likely originates from host or from bacteria. Exogenous indicates that a molecule is likely to come from the environment en thus is a false-discovery. Unknown indicates that no clear link with either is known.

Table S5. Potential confounders for diagnostic accuracy of breath test based on GC-MS-1

| Breath test (Base model)         | OR          | OR lower limit CI          | OR higher limit CI         |                                                                               |
|----------------------------------|-------------|----------------------------|----------------------------|-------------------------------------------------------------------------------|
| Breath test                      | 11.4        | 4.2                        | 31.5                       |                                                                               |
| Addition of potential confounder | Adjusted OR | Adjusted OR lower limit CI | Adjusted OR upper limit CI | Change in $\beta$ coefficient of likelihood of infection based on breath test |
| + Duration of MV before VA-LRTI  | 10.2        | 3.6                        | 28.4                       | 5.9%                                                                          |
| + Infection at admission         | 9.9         | 3.5                        | 27.8                       | 5.2%                                                                          |
| + COPD                           | 13.1        | 4.5                        | 28.3                       | 5.8%                                                                          |
| + P <sub>max</sub>               | 11.8        | 4.2                        | 32.8                       | 0.2%                                                                          |
| + PEEP                           | 11.1        | 4.0                        | 30.4                       | 1.9%                                                                          |
| + FiO <sub>2</sub>               | 12.3        | 4.4                        | 34.7                       | 3.2%                                                                          |
| + etCO <sub>2</sub>              | 11.7        | 3.9                        | 34.9                       | 3.0%                                                                          |

Odds ratio with confidence interval for the breath test and confirmed VA-LRTI and the influence of potential confounders on this relationship. MV = mechanical ventilation; VA-LRTI = ventilator-associated-lower respiratory tract infection; COPD = chronic obstructive pulmonary disease; P<sub>max</sub> = maximum airway pressure; PEEP = positive end-expiratory pressure; FiO<sub>2</sub> = inspired fraction of oxygen; etCO<sub>2</sub> = end-tidal CO<sub>2</sub>.



**Online figures**

Figure S1: Influence of centre on principal components derived from GC-MS-1

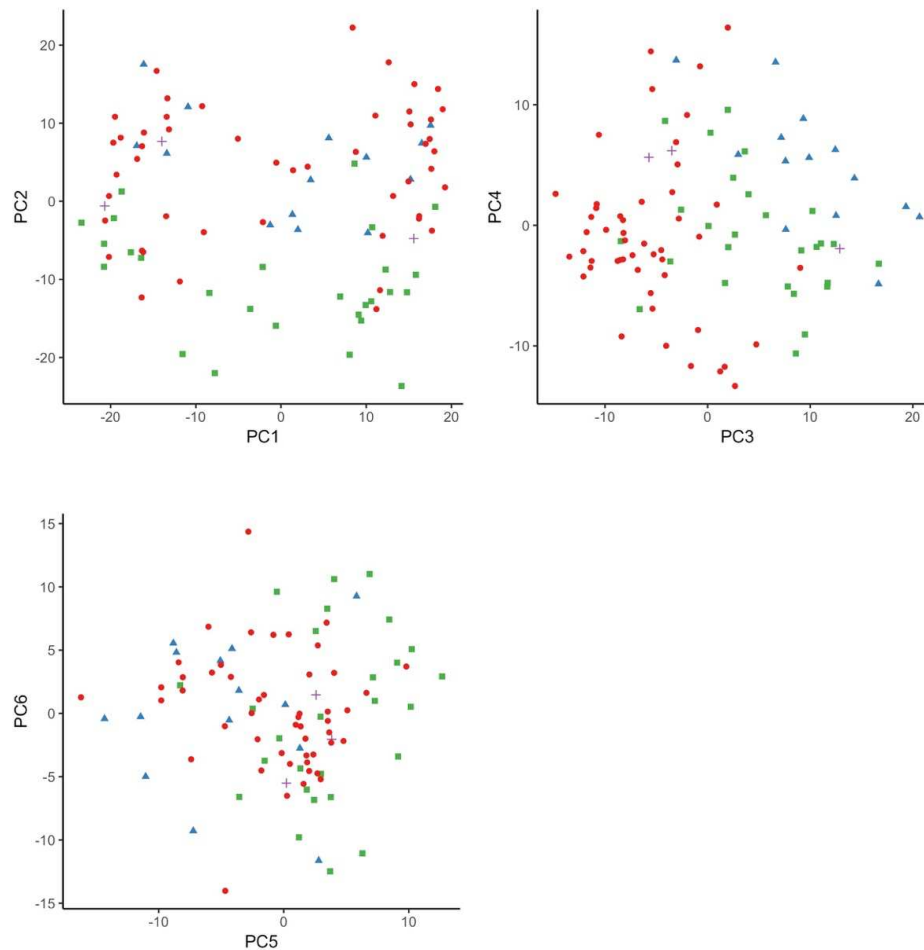

Centres: red dot (●): AMC Amsterdam; blue triangle (▲): Manchester Royal Infirmary; green square (■): Salford; purple cross (+): Wythenshawe hospital .

Interpretation: The centres are not well differentiated on the first two PCs but can be discriminated based on PC3. A small portion of the variation in exhaled metabolites is thus explained by the centre the patient is recruited.

Figure S2: Influence of analysis date on principal components derived from GC-MS-1

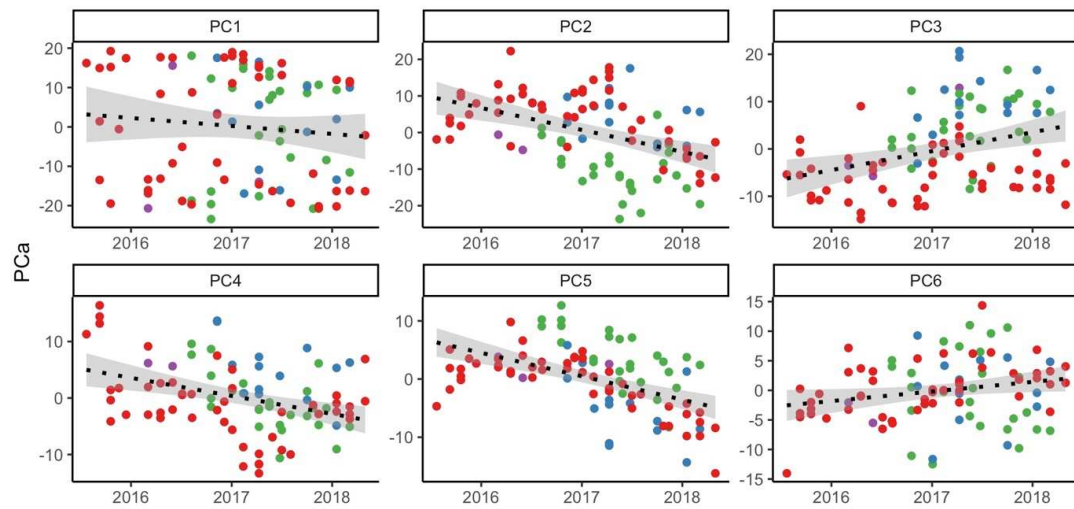

Figure S2. The first six PCs that explain the highest amount of variance are depicted. Dots represent the collected breath samples from either AMC Amsterdam (red ●), Manchester Royal Infirmary (MRI) (blue ●), Salford Trust (green ●), and Wythenshawe Hospital (purple ●). Dashed line = linear regression line; shaded areas = 95% confidence interval of linear regression line.

Interpretation: There are no strong changes in the PCs over time, except for PC3, but this is explained by the addition of other centres as shown in Figure S1.

Figure S3: Influence of storage time on principal components derived from GC-MS-1

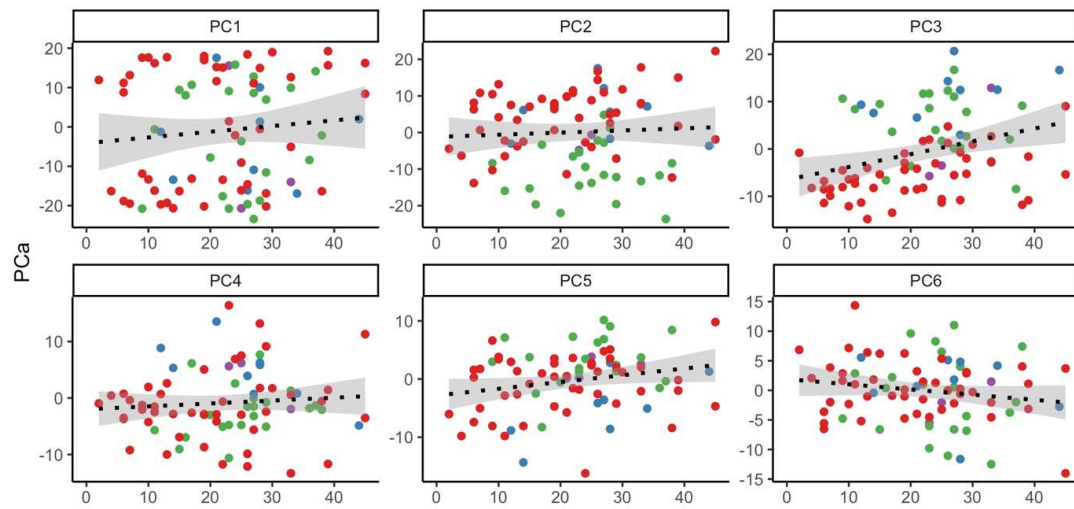

Figure S3. Dots represent the collected breath samples either from AMC Amsterdam (red ●), Manchester Royal Infirmary (MRI) (blue ●), Salford Trust (green ●), and Wythenshawe Hospital (purple ●). Dashed line = linear regression line; shaded areas = 95% confidence interval of linear regression line.

Interpretation: there is no association between storage time and PCs, in other words, the storage time does not explain the differences in volatile metabolites.

Figure S4: Influence of duration of mechanical ventilation on principal components derived from GC-MS-1

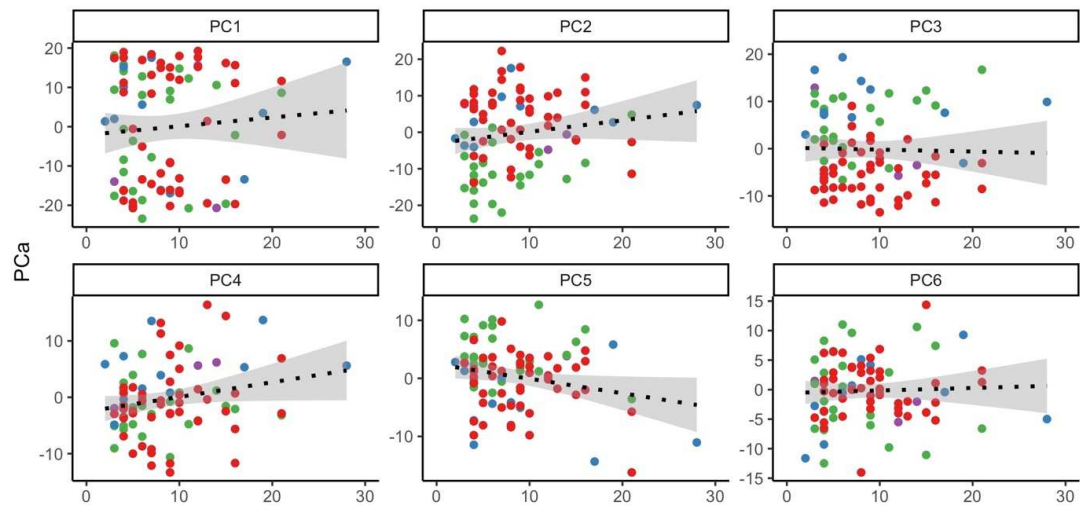

Figure S4: Dots represent the collected breath samples from either AMC Amsterdam (red ●), Manchester Royal Infirmary (MRI) (blue ●), Salford Trust (green ●), and Wythenshawe Hospital (purple ●). Dashed line = linear regression line; shaded areas = 95% confidence interval of linear regression line.

Interpretation: there is no association between duration of mechanical ventilation and PCs, in other words, the duration of ventilation does not explain the differences in volatile metabolites.

Figure S5: Influence of GC column change on principal components from GC-MS-1

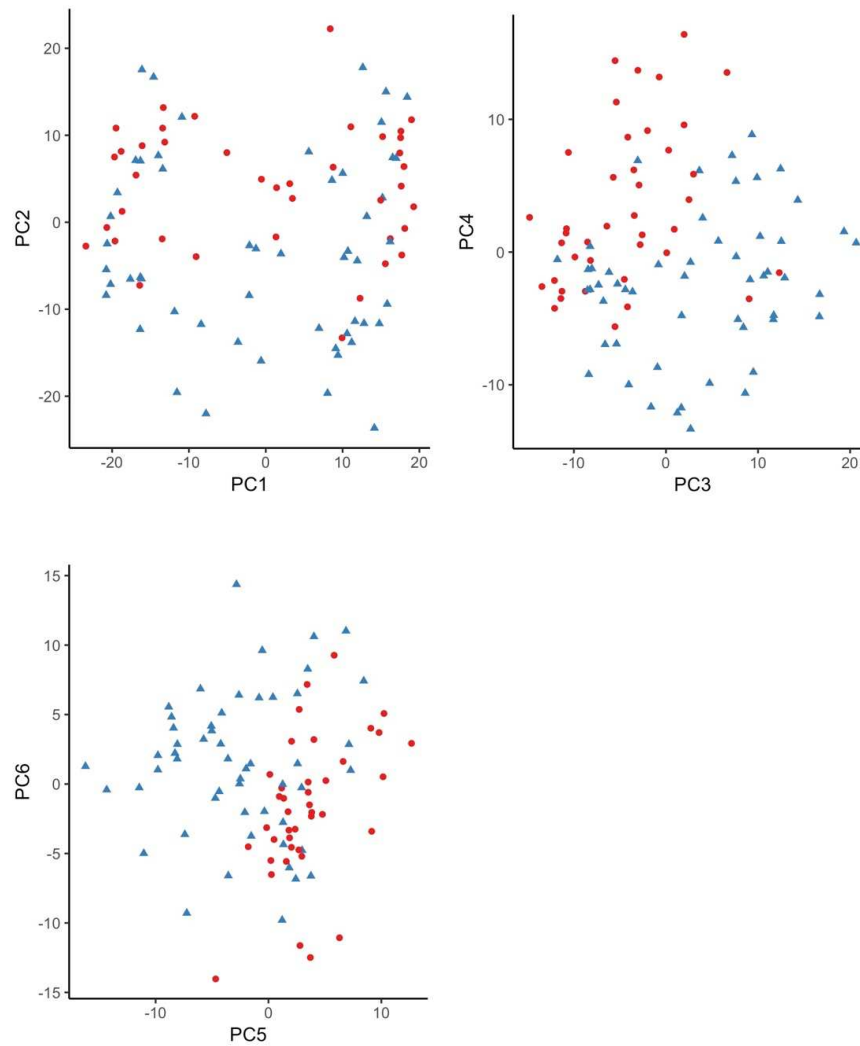

Red dot (●): first column; blue triangle (▲): second column

Interpretation: During the study, the column on GC-MS-1 was changed due to degradation. The change of the column changes the breath profile as indicated by a difference in PC3, PC4, PC5 and PC6. Therefore all subsequent analyses were stratified for each column separately.

Figure S6: Influence of centre on principal components derived from GC-MS-2

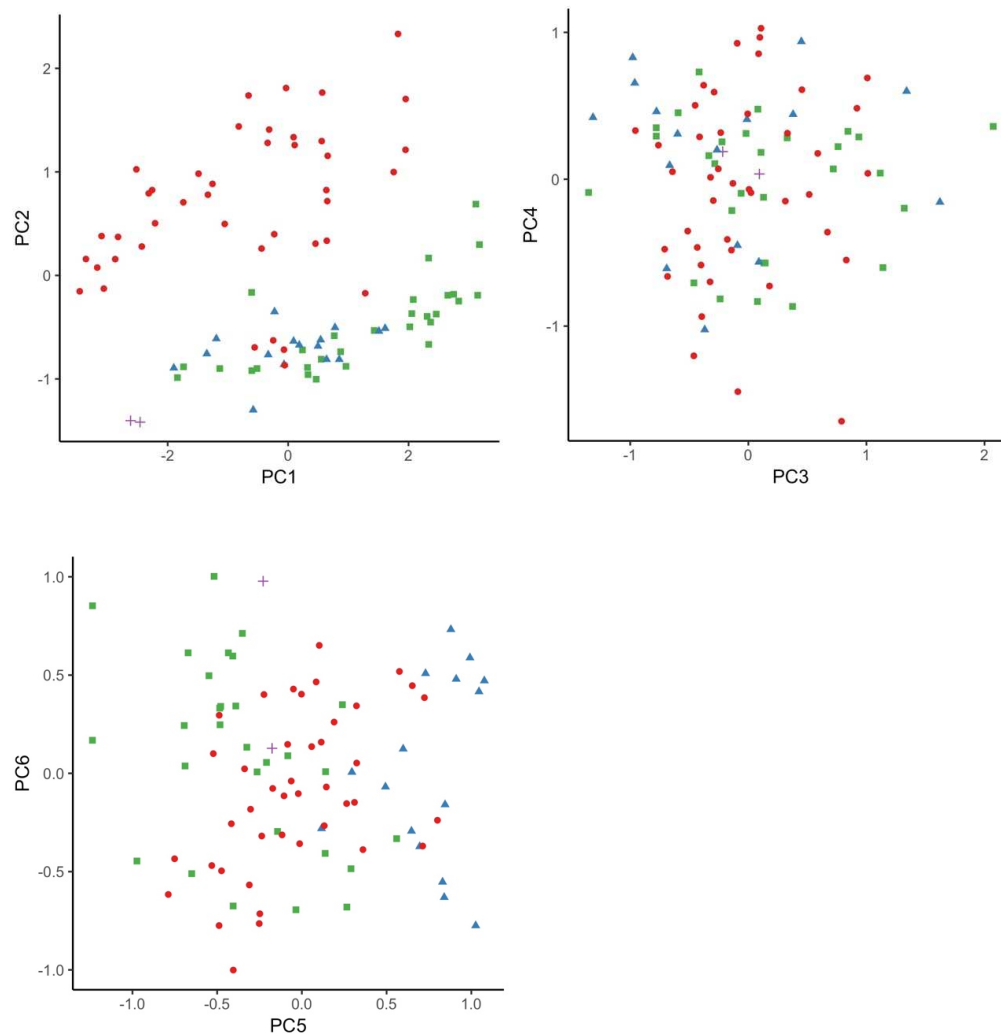

Centres: red dot (●): AMC Amsterdam; blue triangle (▲): Manchester Royal Infirmary; green square (■): Salford; purple cross (+): Wythenshawe hospital

Interpretation: The centres are differentiated based on PC2. Some portion of the variation in exhaled metabolites is thus explained by the centre the patient is recruited.

Figure S7: Influence of analysis date on principal components derived from GC-MS-2

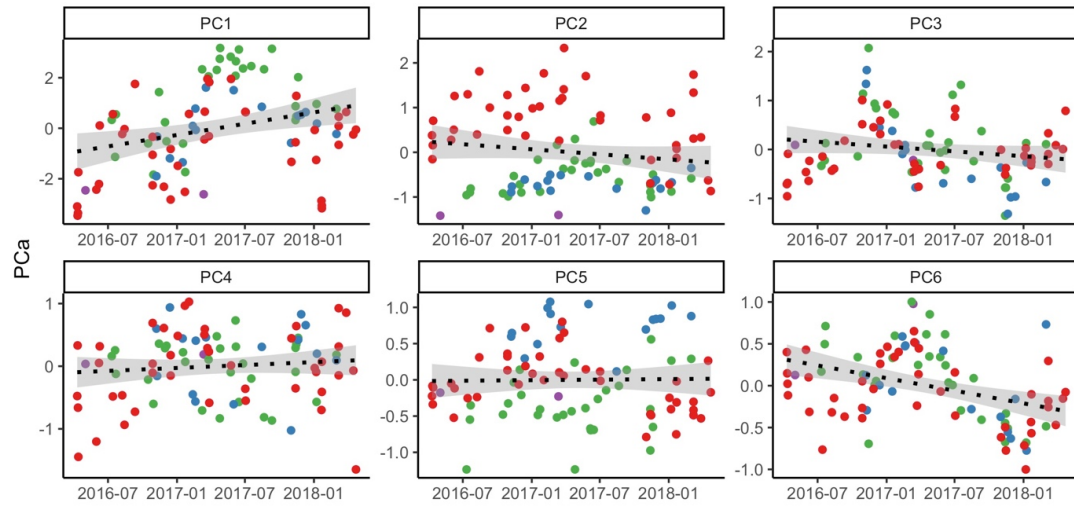

Dots represent the collected breath samples either from AMC Amsterdam (red ●), Manchester Royal Infirmary (MRI) (blue ●), Salford Trust (green ●), and Wythenshawe Hospital (purple ●). Dashed line = linear regression line; shaded areas = 95% confidence interval of linear regression line.

Interpretation: There is no relationship between the time of recruitment and the PCs, so there likely is no systematic and linear change to the detector over time.

Figure S8: Influence of storage time on principal components derived from GC-MS-2

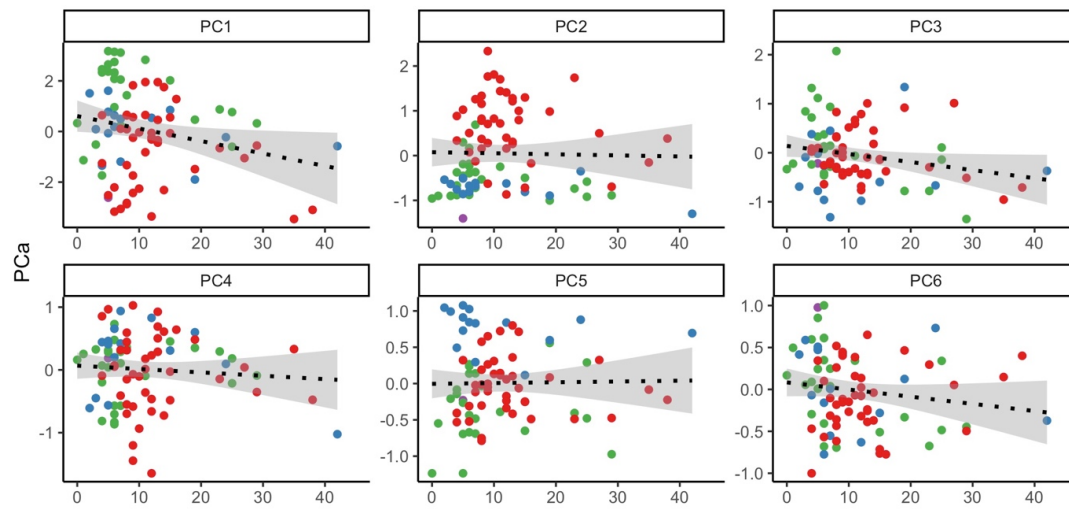

Dots represent the collected breath samples either from AMC Amsterdam (red ●), Manchester Royal Infirmary (MRI) (blue ●), Salford Trust (green ●), and Wythenshawe Hospital (purple ●). Dashed line = linear regression line; shaded areas = 95% confidence interval of linear regression line.

Interpretation: there is no association between storage time and PCs, in other words, the storage time does not explain the differences in volatile metabolites.



Figure S9: Influence of duration of mechanical ventilation on principal components derived from GC-MS-2

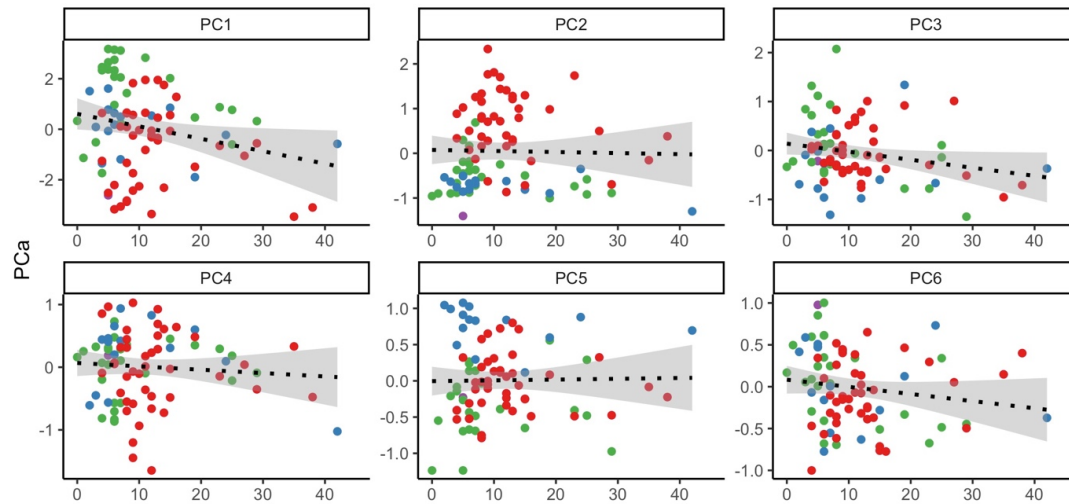

Dots represent the collected breath samples either from AMC Amsterdam (red ●), Manchester Royal Infirmary (MRI) (blue ●), Salford Trust (green ●), and Wythenshawe Hospital (purple ●). Dashed line = linear regression line; shaded areas = 95% confidence interval of linear regression line.

Interpretation: there is no association between duration of mechanical ventilation and PCs, in other words, the duration of ventilation does not explain the differences in volatile metabolites.

Figure S10: Correct classification rate from SPLS-DA for culture positive vs. culture negative based on 1000 random permutations of the group allocation for GC-MS-1 and -2.

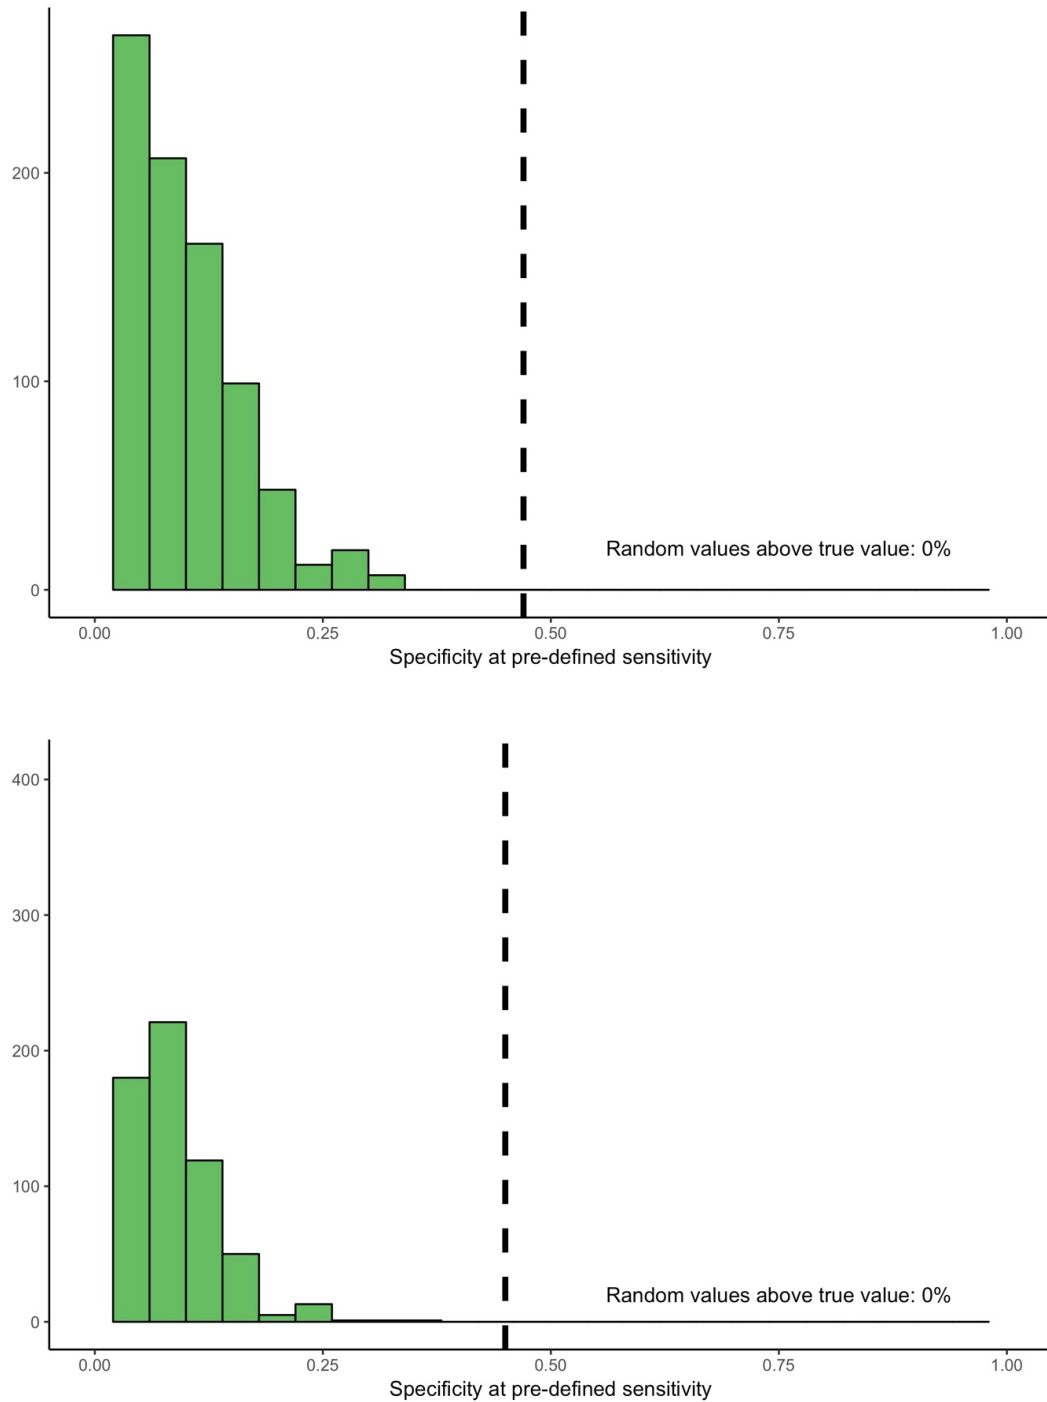

Interpretation: When permutating the labels of confirmed VA-LRTI to a random label there were no scenarios in which similar tech characteristics could be obtained. This suggests that the analysis was not overfit for the data.

Figure S11: ROC curves for culture positive vs. negative.

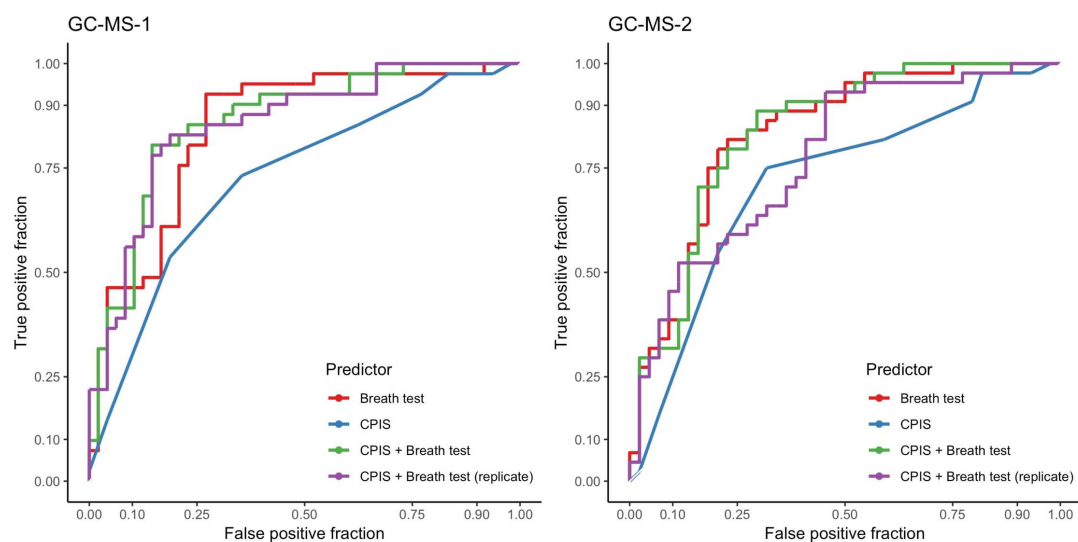

Figure S11. Panel on the left shows the receiver operating characteristics curve for GC-MS-1 and on the right for GC-MS-2. The blue line indicates the performance of the CPIS alone. The red line indicates the breath test. The green line shows the performance for the combination of breath test and CPIS. The purple line is the performance of the same algorithm in a second sample taken from the same patient. For GC-MS-1, the breath test alone delivered an AUROCC 0.86 (95%-confidence interval (CI): 0.79-0.94); CPIS alone AUROCC 0.74 (95%-CI: 0.64-0.84); CPIS + breath test: AUROCC 0.87 (95%-CI: 0.80-0.94); replicate CPIS + breath test: AUROCC 0.85 (95%-CI: 0.77-0.93). For GC-MS-2: CPIS alone: AUROCC 0.72 (95%-CI 0.61-0.83); breath test alone: AUROCC 0.83 (95%-CI: 0.75-0.92); CPIS + breath test AUROCC 0.84 (95%-CI 0.75-0.92); replicate CPIS + breath test: AUROCC 0.77 (95%-CI: 0.67-0.86).

**Supplemental references**

1. van Oort PMP, Nijssen T, Weda H, et al (2017) BreathDx – molecular analysis of exhaled breath as a diagnostic test for ventilator-associated pneumonia: protocol for a European multicentre observational study. *BMC Pulm Med* 17:1. <https://doi.org/10.1186/s12890-016-0353-7>
2. Flahault A, Cadilhac M, Thomas G (2005) Sample size calculation should be performed for design accuracy in diagnostic test studies. *J Clin Epidemiol* 58:859–862. <https://doi.org/10.1016/j.jclinepi.2004.12.009>
3. Fowler SJ, Basanta-Sanchez M, Xu Y, et al (2015) Surveillance for lower airway pathogens in mechanically ventilated patients by metabolomic analysis of exhaled breath: a case-control study. *Thorax thoraxjnl-2014-206273-*. <https://doi.org/10.1136/thoraxjnl-2014-206273>
4. Du Rand IA, Blaikley J, Booton R, et al (2013) Summary of the British Thoracic Society guideline for diagnostic flexible bronchoscopy in adults. *Thorax* 68:786–787. <https://doi.org/10.1136/thoraxjnl-2013-203629>
5. Horváth I, Barnes PJ, Loukides S, et al (2017) A European Respiratory Society technical standard : exhaled biomarkers in lung disease. *Eur Respir J* 49:. <https://doi.org/10.1183/13993003.00965-2016>
6. Lindstrom P, Mallard W NIST Chemistry WebBook, NIST Standard Reference Database Number 69. In: 69
7. Sumner LW, Samuel T, Noble R, et al (2007) Proposed minimum reporting standards for chemical analysis Chemical Analysis Working Group (CAWG) Metabolomics Standards Initiative (MSI). *Metabolomics* 3:211–221. <https://doi.org/10.1007/s11306-007-0082-2>. Proposed
8. Chun H, Keles S, Keleş S (2010) Sparse partial least squares regression for simultaneous dimension reduction and variable selection. *J R Stat Soc Ser B Stat Methodol* 72:3–25.

<https://doi.org/10.1111/j.1467-9868.2009.00723.x>
